# Supplementary material for: The Biomimetic System of Oleanolic Acid and Oleic Acid at the Air-Water Interface–Interactions in Terms of Nanotechnology-Based Drug Delivery Systems
Source: MDPI journal article supplement (doi:10.3390/membranes12121215), 2022-12-01
Supplement: s1 [file s1]

# The Biomimetic System of Oleanolic Acid and Oleic Acid at the Air-Water Interface–Interactions in Terms of Nanotechnology-Based Drug Delivery Systems

Martyna Krajewska \*, Katarzyna Dopierała \* and Krystyna Prochaska

Institute of Chemical Technology and Engineering, Poznan University of Technology, Berdychowo 4, 60-965 Poznań, Poland

\* Correspondence: martyna.m.krajewska@doctorate.put.poznan.pl (M.K.);

katarzyna.dopierala@put.poznan.pl (K.D.); Tel.: +48-61-665-33-42 (M.K.); +48-61-665-37-72 (K.D.)

## Supplementary materials

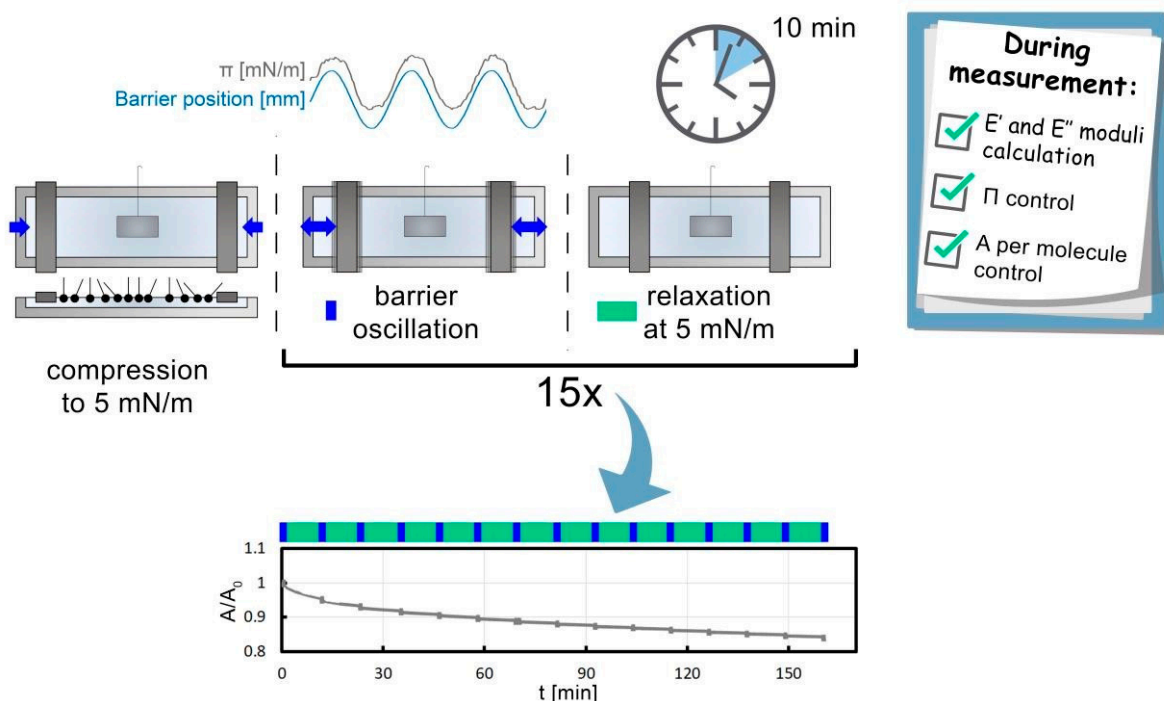

**Figure S1.** A schematic drawing of the oscillation-relaxation experiment. The experiment aimed to investigate the values of the  $E'$  and  $E''$  moduli over time. After monolayer compression to 5 mN/m, the consecutive oscillation cycles were separated by 10-minute intervals during which the surface pressure was kept at 5 mN/m.

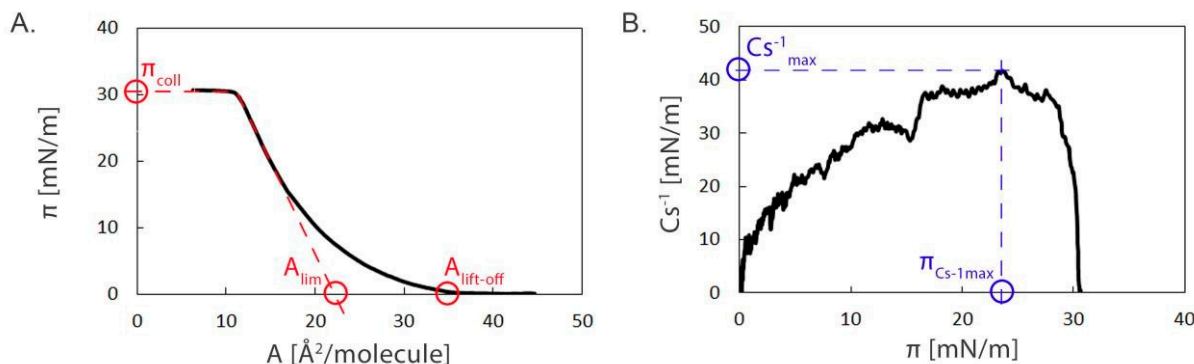

**Figure S2.** An example graph of the  $\pi$ -A isotherm (A) and the  $Cs^{-1}$  vs.  $\pi$  (B) with the characteristic values highlighted.

**Table S1.** The characteristic values determined based on the  $\pi - A$  isotherms and compression moduli of OLA, OA and their mixtures.

| <i>System</i>     | $A_{\text{lift-off}}$ | $A_{\text{lim}}$ | $\pi_{\text{coll}}$            | $Cs_{\text{max}}^{-1}$         | $\Pi Cs_{\text{max}}^{-1}$ | <i>State</i> |
|-------------------|-----------------------|------------------|--------------------------------|--------------------------------|----------------------------|--------------|
|                   |                       |                  | mN/m                           | mN/m                           | mN/m                       |              |
|                   |                       |                  | $\text{\AA}^2/\text{molecule}$ | $\text{\AA}^2/\text{molecule}$ |                            |              |
| <b>OLA</b>        | 75                    | 53               | 41                             | 130                            | 29                         | LC           |
| <b>OLA:OA 5:1</b> | 56                    | 43               | 37                             | 209                            | 28.5                       | LC           |
| <b>OLA:OA 2:1</b> | 43                    | 41               | 35                             | 232                            | 23.5                       | LC           |
| <b>OLA:OA 1:1</b> | 42                    | 38               | 29                             | 104                            | 18                         | LC           |
| <b>OLA:OA 1:2</b> | 40                    | 32               | 29                             | 68                             | 19.5                       | LE – LC      |
| <b>OLA:OA 1:5</b> | 37                    | 25               | 29                             | 99                             | 25.5                       | LE – LC      |
| <b>OA</b>         | 34                    | 23               | 31                             | 42                             | 23.5                       | LE           |

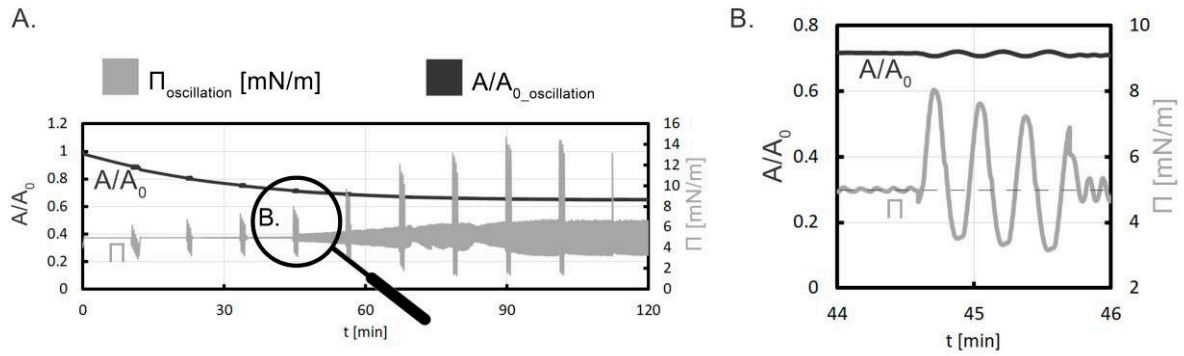

**Figure S3.** An example graph of the relative area  $A/A_0$  vs. time and the surface pressure vs. time, varying significantly due to the oscillation (A) and close-up emphasizing the peak asymmetry of the surface pressure plot.
